# Supplementary material for: A tri-functional vanadium(iv) complex to detect cysteine oxidation
Source: Royal Society of Chemistry journal article supplement (doi:10.1039/c7dt00076f), 2017-01-01
Supplement: c7dt00076f1.pdf [file c7dt00076f1.pdf]

## SUPPLEMENTARY INFORMATION

for

### **A tri-functional vanadium(IV) complex to detect cysteine oxidation**

A. Cilibrizzi, M. Fedorova, J. Collins, R. Leatherbarrow, R. Woscholski, and R. Vilar

*Department of Chemistry, Imperial College London, Exhibition Road, London SW7 2AZ,  
UK*

#### **Content (spectra and chromatograms):**

|                                                                                                      |    |
|------------------------------------------------------------------------------------------------------|----|
| 1. LC-MS and $^1\text{H}$ NMR for dipicolinic intermediates <b>2-6</b> and <b>9-12</b>               | 2  |
| 2. LC-MS, HRMS and $^1\text{H}$ NMR for fully protected dipicolinate <b>14</b>                       | 7  |
| 3. LC-MS, HRMS, $^1\text{H}/^{13}\text{C}$ /COSY/HSQC NMRs, UV/vis and emission for ligand <b>15</b> | 9  |
| 4. ESI-MS, MALDI, UV and emission for $\text{VO}(\text{pic})_2$ complex <b>16</b>                    | 13 |

#### **Captions:**

|                                                                                                             |    |
|-------------------------------------------------------------------------------------------------------------|----|
| Figure S1. Analytical chiral HPLC profiles of ligand <b>15</b>                                              | 12 |
| Figure S2. $^{51}\text{V}$ NMR spectrum of <b>16</b>                                                        | 16 |
| Figure S3. Linear plots for the calculation of fluorescence quantum yields for <b>15</b> and <b>16</b>      | 17 |
| Figure S4. LMW-PTP activity in the presence of OMFP as a substrate                                          | 17 |
| Figure S5. $\text{IC}_{50}$ curves of <b>16</b> for PTP1B, SHP-2, LMW-PTP, and VHR                          | 18 |
| Figure S6. $\text{IC}_{50}$ curves of $\text{VO}(\text{pic})_2$ (reference compound) and <b>16</b> for PTEN | 18 |
| Figure S7. Live cell uptake of <b>16</b> (flow cytometry)                                                   | 19 |
| Figure S8. Cytotoxicity (MTS assay) of <b>16</b>                                                            | 19 |
| Figure S9. Live cell uptake of <b>16</b> + PMA (flow cytometry)                                             | 20 |
| Figure S10. Live cell uptake of <b>16</b> + PMA (microscopy)                                                | 20 |
| Figure S11. Flow cytometry histogram of HCT116 cells incubated with <b>16</b> and $\text{H}_2\text{O}_2$    | 21 |
| Figure S12. Emission spectra for <b>16</b> in the absence/presence of $\text{H}_2\text{O}_2$ for 30 min     | 21 |

## Dipicolinate 2

4.6e+004

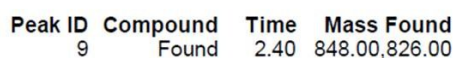

9: (Time: 2.40) Combine (194:202-(181:184+212:215))

1:TOF MS ES+  
2.2e+005

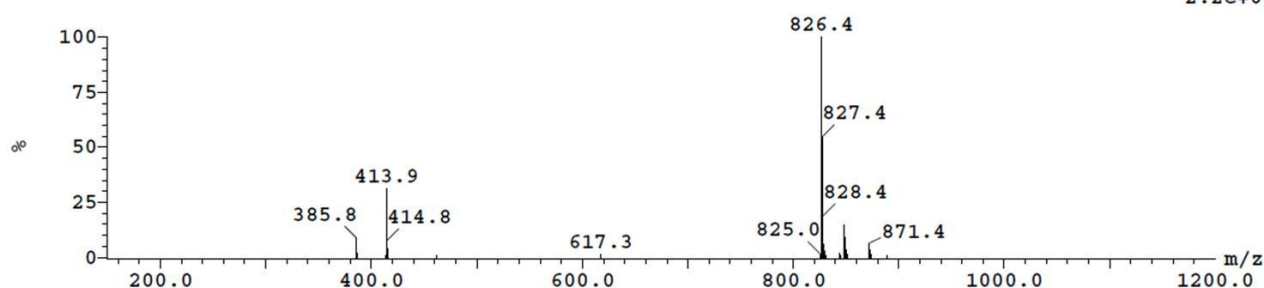

1: TOF MS ES+ :320.5+325.5+303.5

2.7e+003

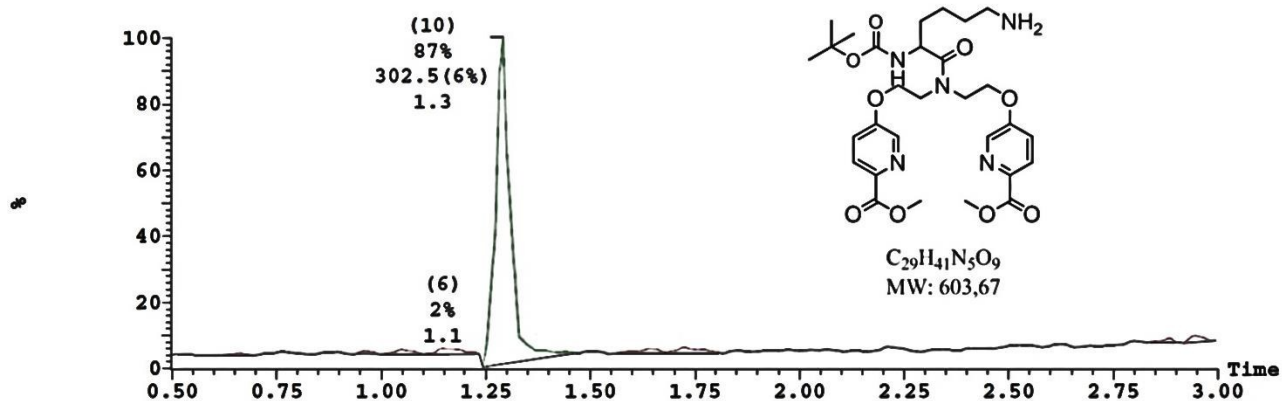

| Peak ID | Compound | Time | Mass Found    |
|---------|----------|------|---------------|
| 10      | Found    | 1.33 | 626.00,604.00 |

10:(Time: 1.33) Combine (105:113-(93:96+122:126))

1:TOF MS ES+  
2.1e+002

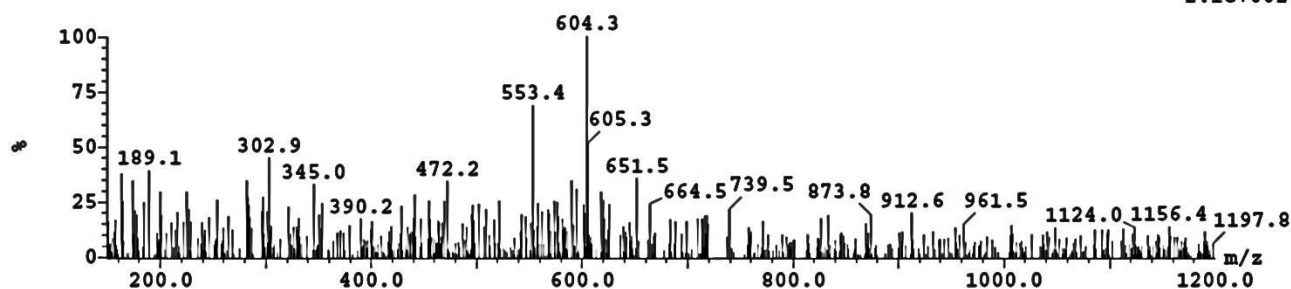

## Dipicolinate 5

1: TOF MS ES+ :828+806

3.2e+003

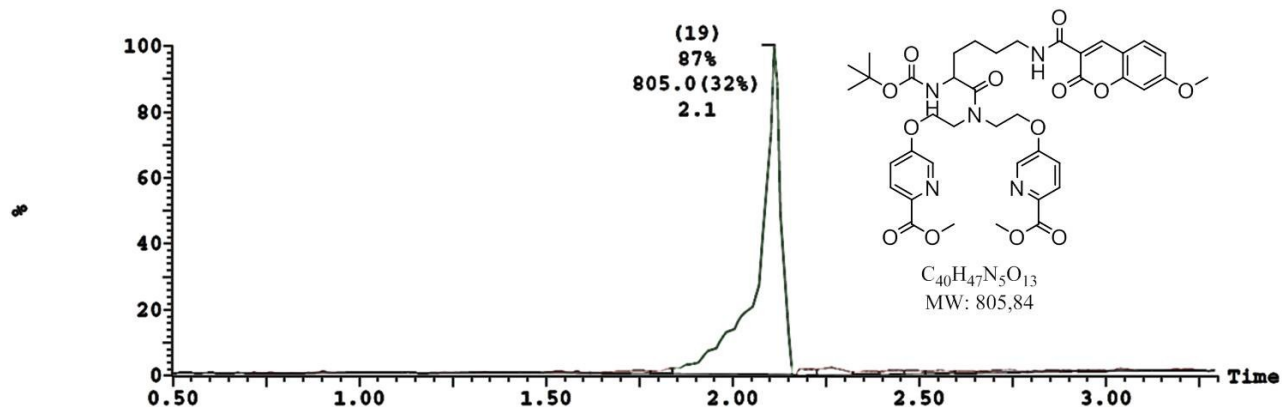

| Peak ID | Compound | Time | Mass Found     |
|---------|----------|------|----------------|
| 19      | Found    | 2.11 | 828.00, 806.00 |

19: (Time: 2.11) Combine (170:178- (157:160+187:191))

1: TOF MS ES+  
8.1e+003

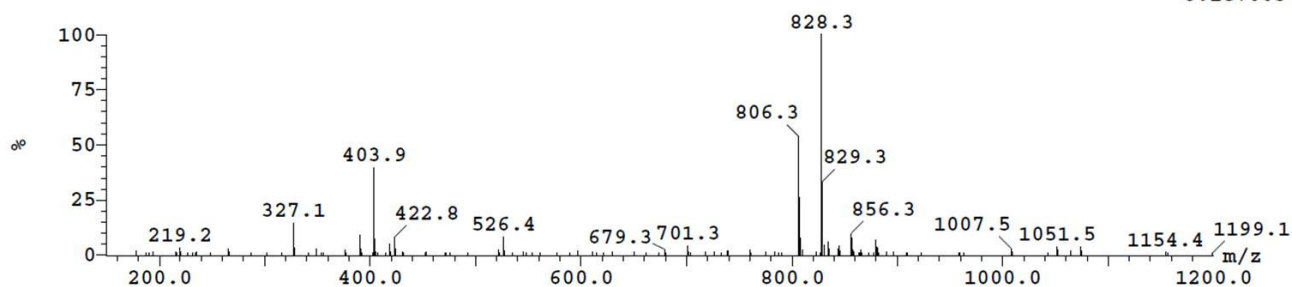

## Dipicolinate 9

1: TOF MS ES+ :848+826

2.3e+003

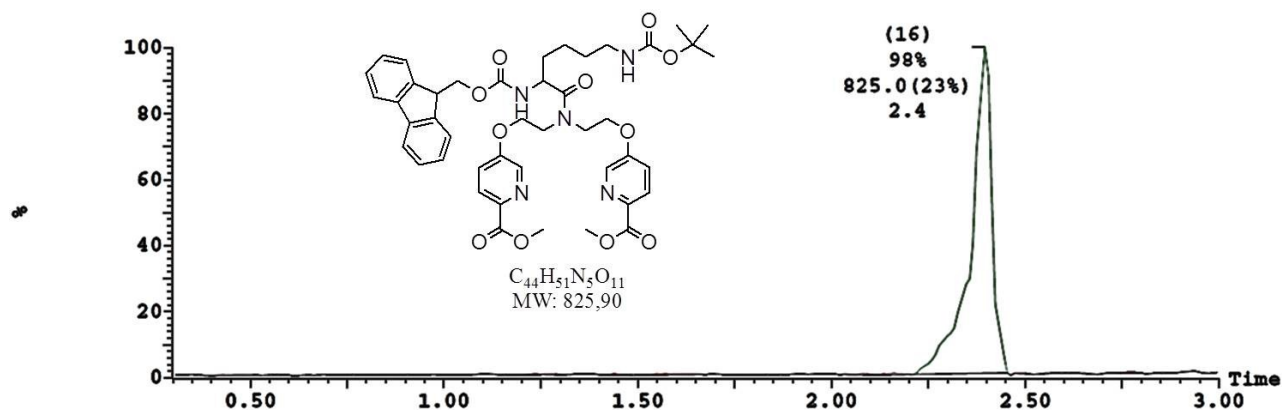

| Peak ID | Compound | Time | Mass Found     |
|---------|----------|------|----------------|
| 16      | Found    | 2.40 | 848.00, 826.00 |

16: (Time: 2.40) Combine (193:201- (181:184+211:214))

1: TOF MS ES+  
6.5e+003

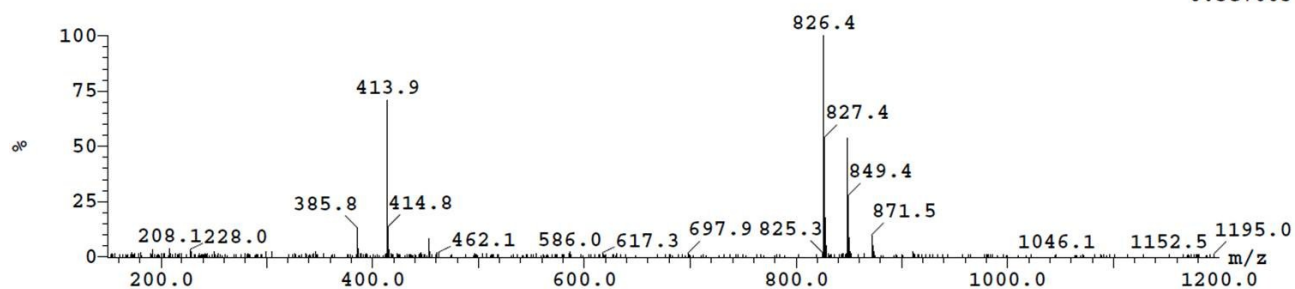

## Dipicolinate 10

1: TOF MS ES+ :626+604

9.6e+003

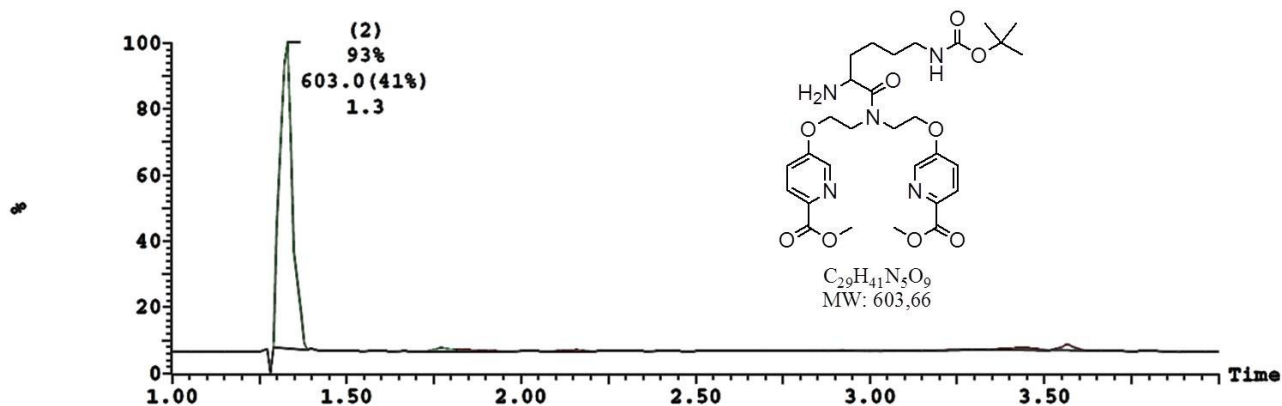

| Peak ID | Compound | Time | Mass Found     |
|---------|----------|------|----------------|
| 2       | Found    | 1.33 | 626.00, 604.00 |

2: (Time: 1.33) Combine (106:114- (93:96+124:127))

1: TOF MS ES+  
1.7e+004

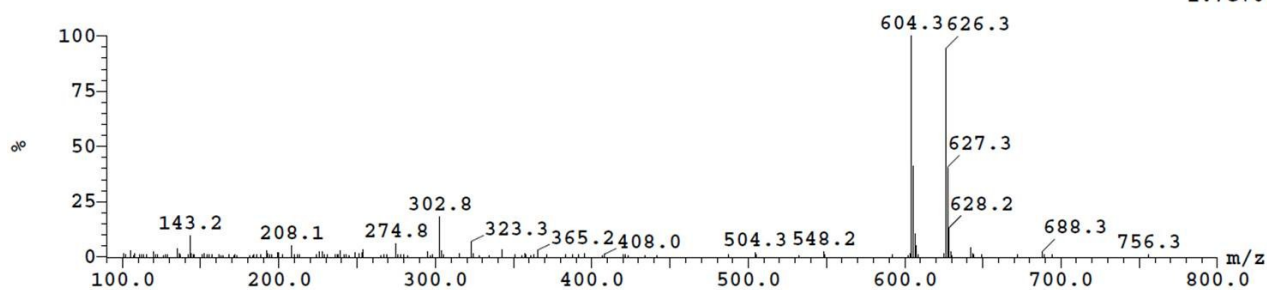

## Dipicolinate 11

1: TOF MS ES+ :778+756

5.7e+004

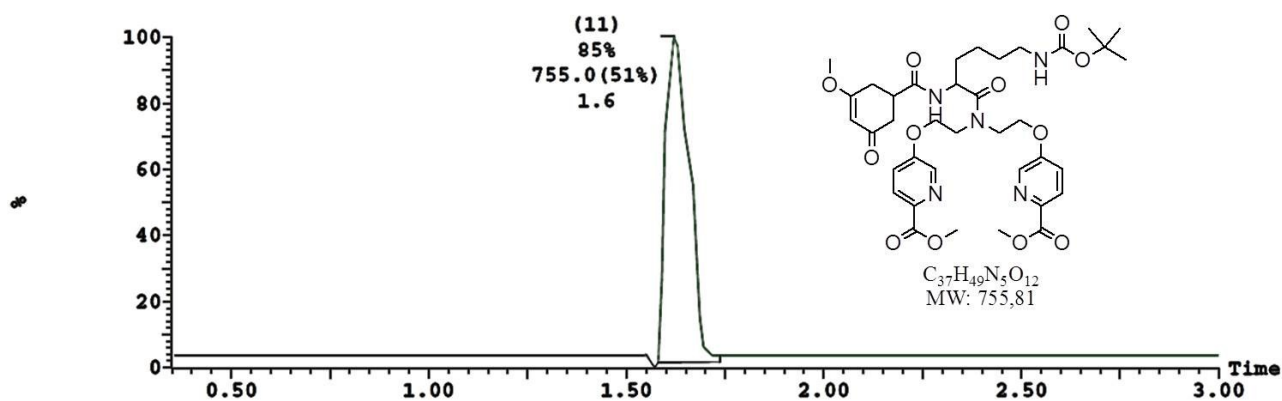

| Peak ID | Compound | Time | Mass Found     |
|---------|----------|------|----------------|
| 11      | Found    | 1.62 | 778.00, 756.00 |

11: (Time: 1.62) Combine (129:137- (117:120+146:150))

1: TOF MS ES+  
1.9e+005

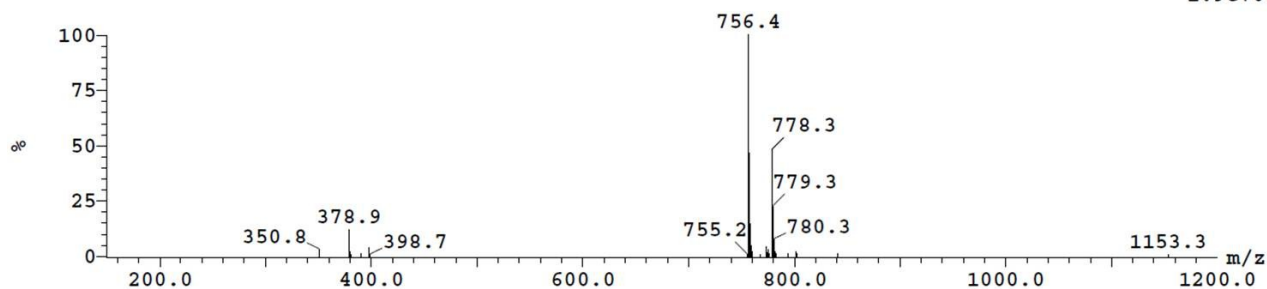

# Dipicolinate 12

1: TOF MS ES+ :678+656

3.1e+003

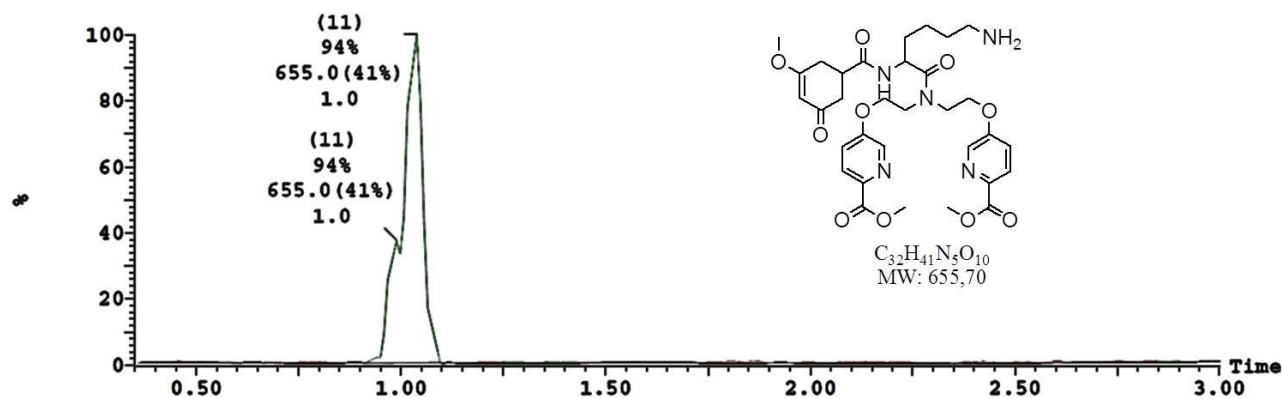

Peak ID Compound Time Mass Found  
11 Found 1.04 678.00,656.00

11: (Time: 1.04) Combine (81:89-(69:72+98:102))

1:TOF MS ES+  
8.1e+003

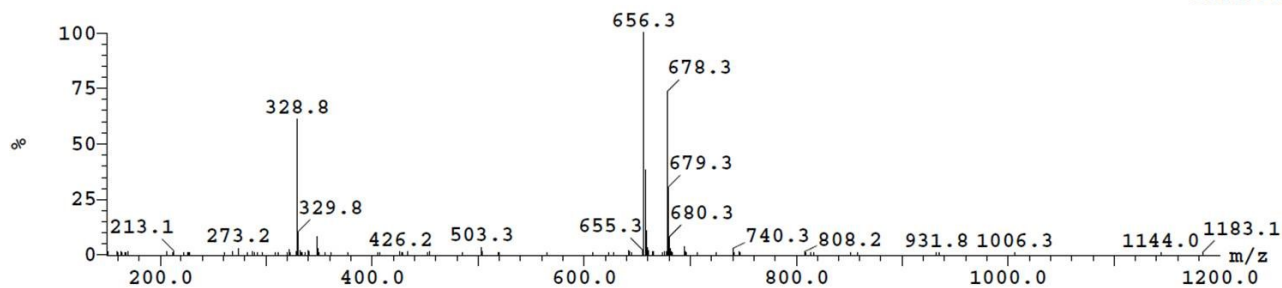

# Dipicolinate 9

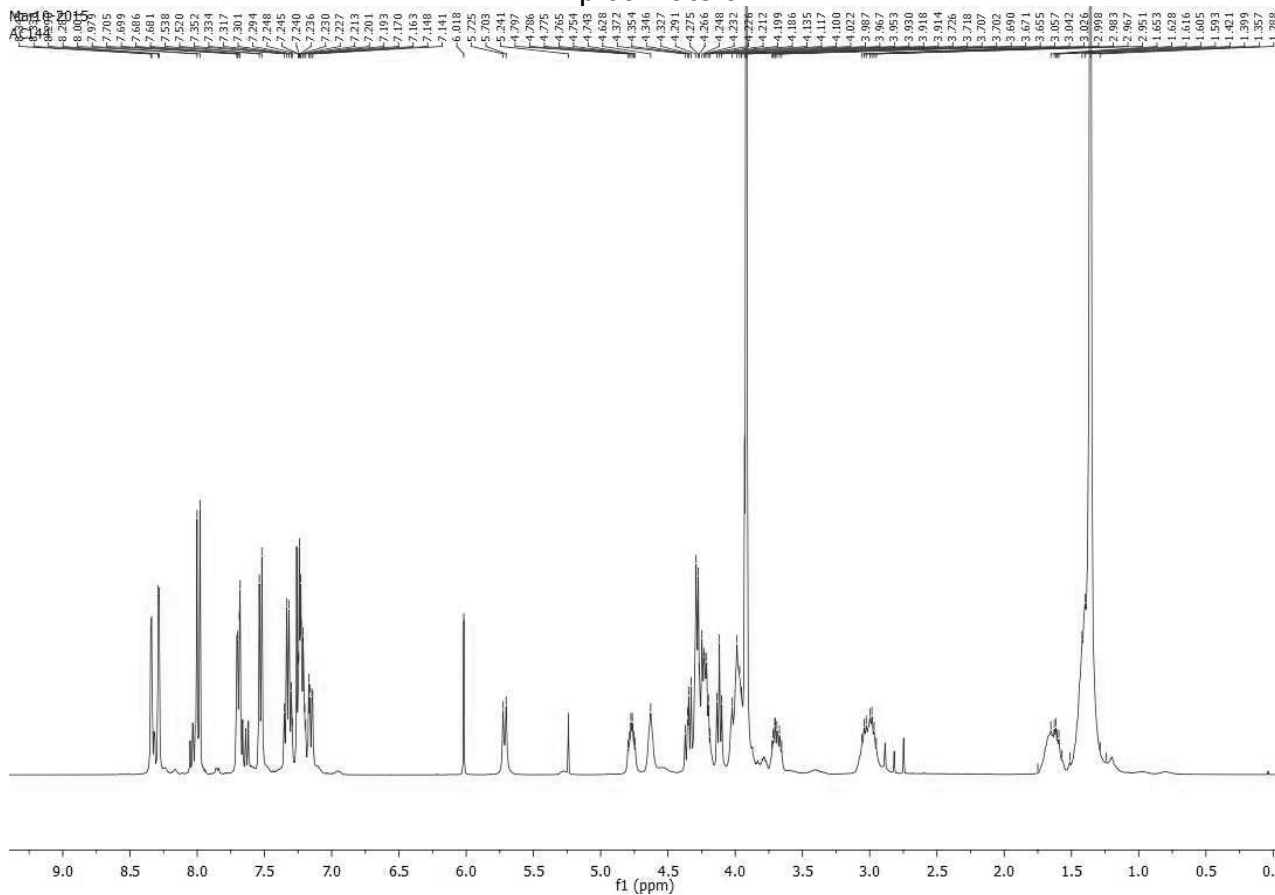

# Dipicolinate 10

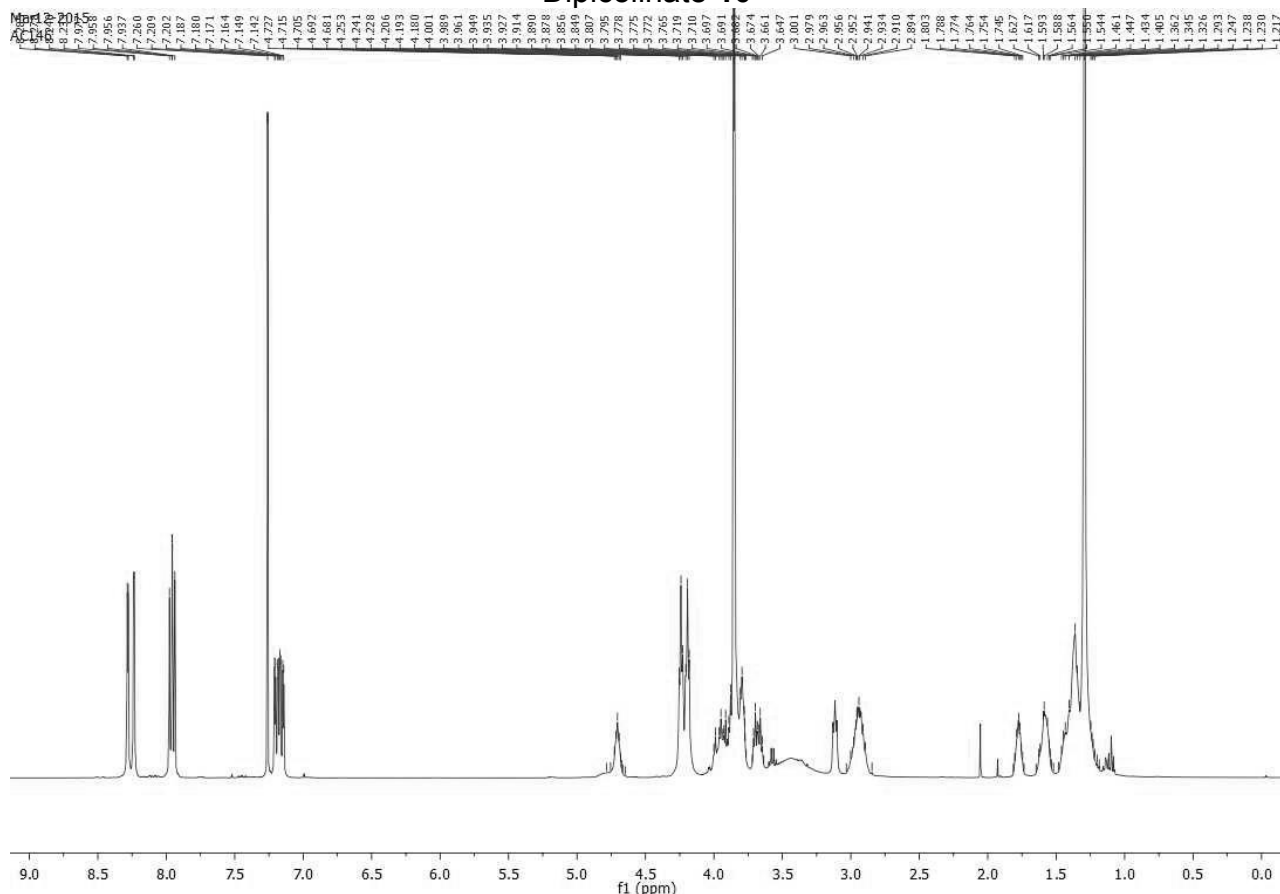

# Dipicolinate 11

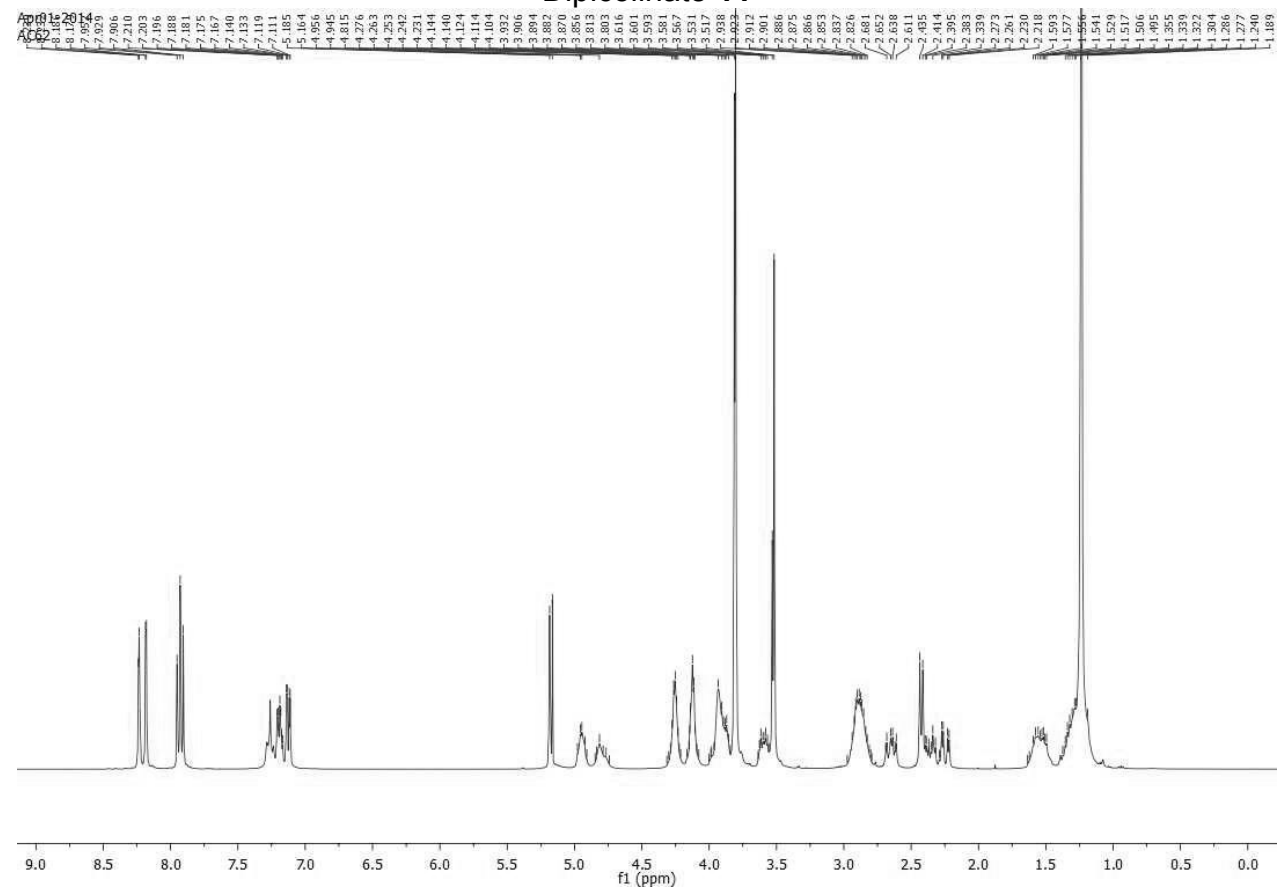

[illegible]

1: TOF MS ES+ :880+858

1.1e+004

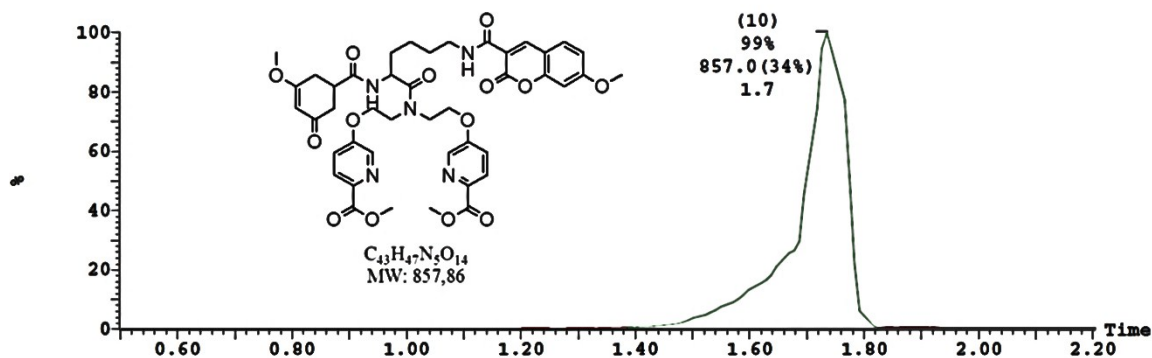

| Peak ID | Compound | Time | Mass Found    |
|---------|----------|------|---------------|
| 10      | Found    | 1.73 | 880.00,858.00 |

10:(Time: 1.73) Combine (139:147-(126:130+157:160))

1:TOF MS ES+  
4.5e+004

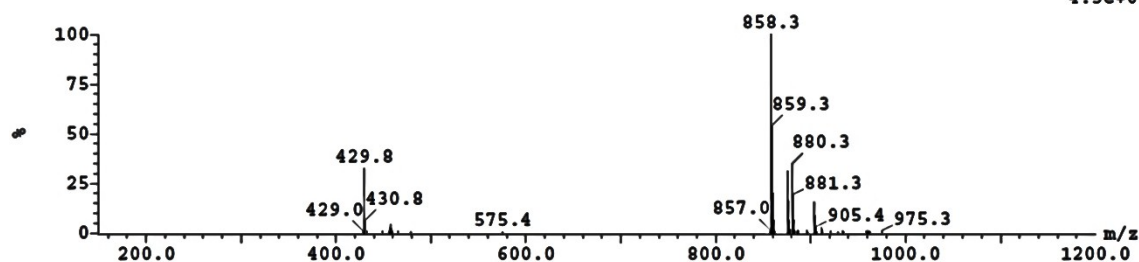

# Elemental Composition Report

Page 1

## Single Mass Analysis

Tolerance = 10.0 PPM / DBE: min = -1.5, max = 50.0

Element prediction: Off

Number of isotope peaks used for i-FIT = 3

## Monoisotopic Mass, Even Electron Ions

328 formula(e) evaluated with 1 results within limits (all results (up to 1000) for each mass)

Elements Used:

C: 43-43 H: 0-200 N: 0-10 O: 0-14 Na: 0-1

A.CILIBRIZZI AC128

ms17122a 141 (1.717)

1: TOF MS ES+  
6.53e+003

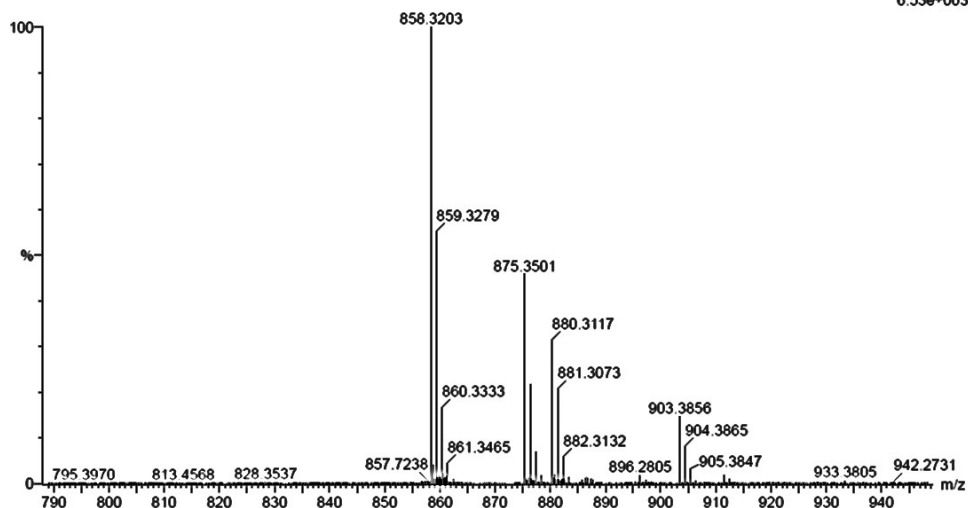

Minimum:

Maximum:

5.0

10.0

-1.5

50.0

Mass

Calc. Mass

mDa

PPM

DBE

i-FIT

i-FIT (Norm) Formula

858.3203

858.3198

0.5

0.6

22.5

105.7

0.0

C43 H48 N5  
O14

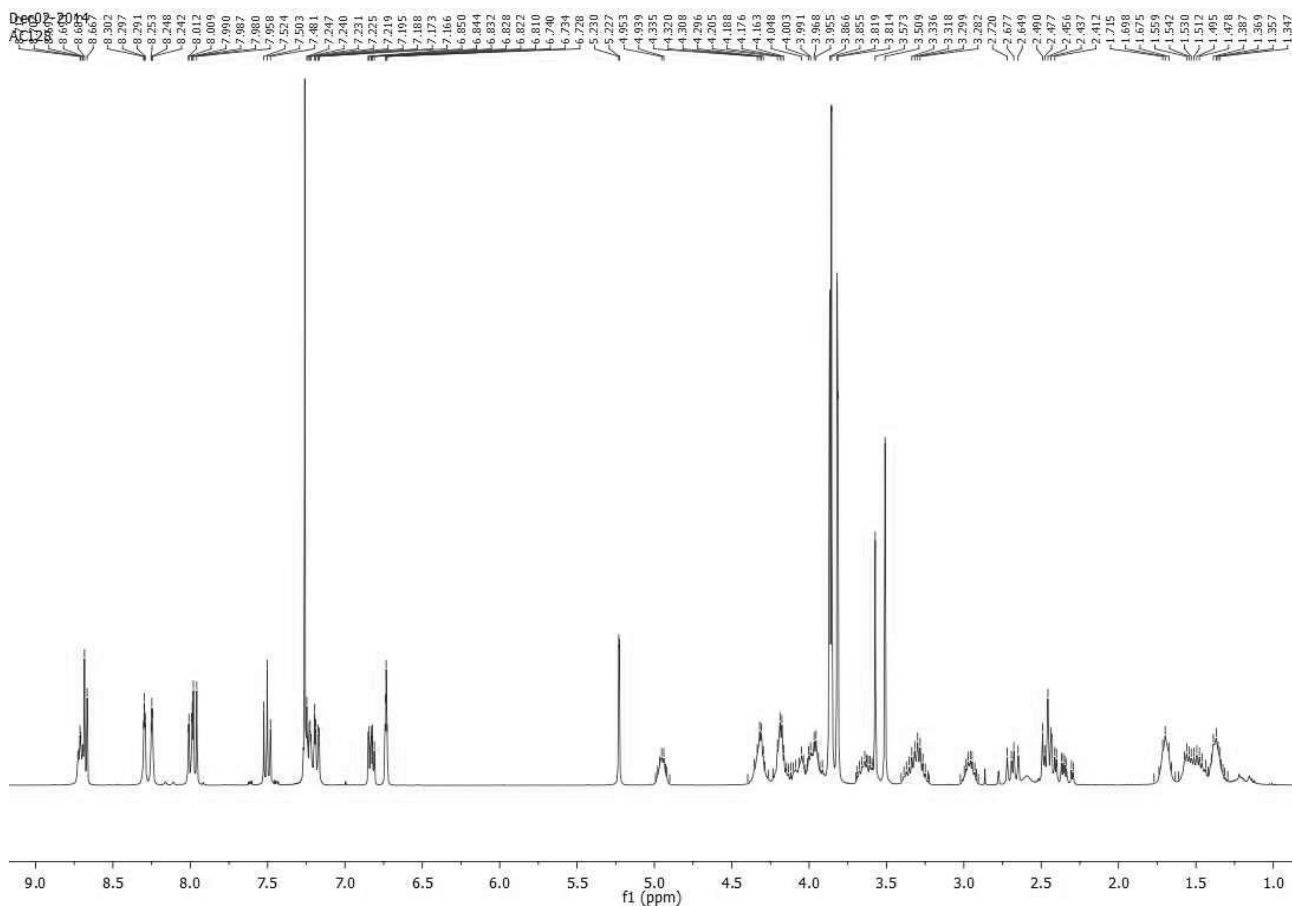



### 3. LC-MS, HRMS, $^1\text{H}/^{13}\text{C}/\text{COSY}/\text{HSQC}$ NMRs, UV/vis and emission for ligand 15

1: TOF MS ES+ :838+816

1.1e+004

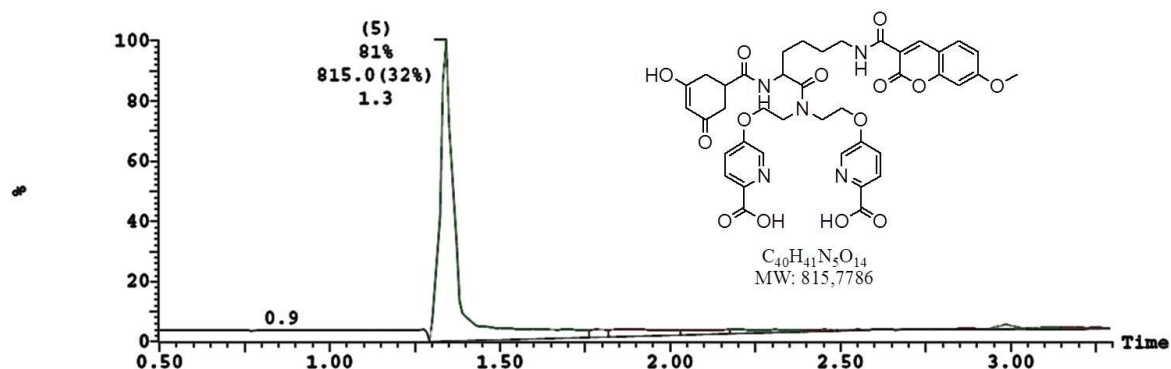

Peak ID Compound Time Mass Found  
5 Found 1.34 838.00,816.00

5: (Time: 1.34) Combine (107:115- (94:97+125:128))

1: TOF MS ES+  
3.3e+004

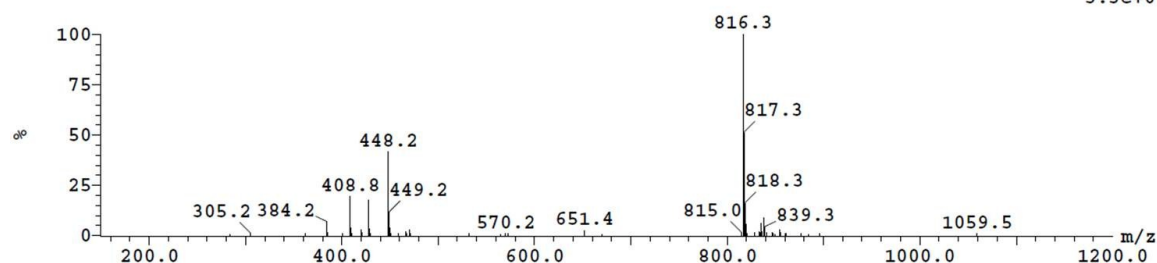

#### Elemental Composition Report

Page 1

##### Single Mass Analysis

Tolerance = 10.0 PPM / DBE: min = -1.5, max = 50.0

Element prediction: Off

Number of isotope peaks used for i-FIT = 3

Monoisotopic Mass, Even Electron Ions

172 formula(e) evaluated with 1 results within limits (all results (up to 1000) for each mass)

Elements Used:

C: 40-40 H: 5-300 N: 0-10 O: 0-15

A.CILIBRIZZI AC67 CR

ms12168b 113 (1.373)

1: TOF MS ES+  
1.78e+003

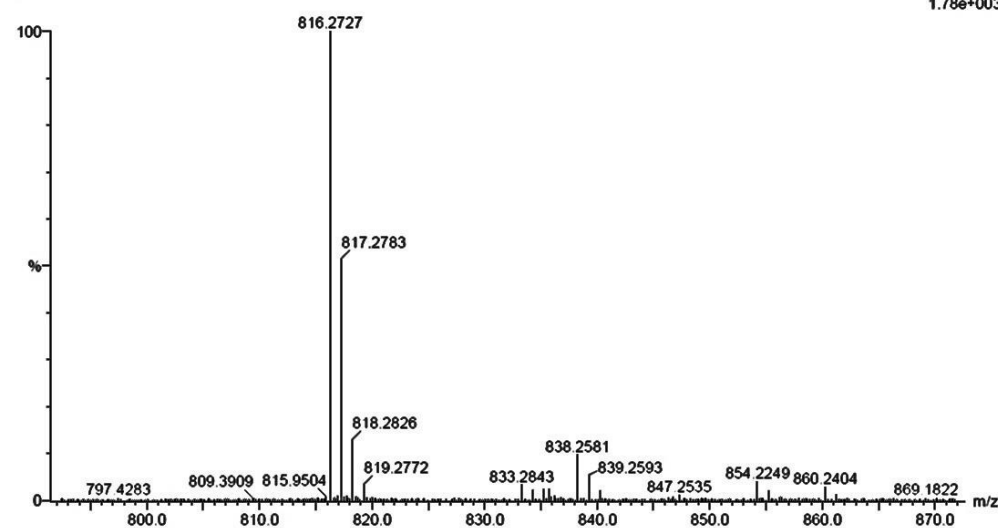

Minimum: -1.5  
Maximum: 5.0 10.0 50.0

| Mass     | Calc. Mass | mDa  | PPM  | DBE  | i-FIT | i-FIT (Norm) | Formula        |
|----------|------------|------|------|------|-------|--------------|----------------|
| 816.2727 | 816.2728   | -0.1 | -0.1 | 22.5 | 55.7  | 0.0          | C40 H42 N5 O14 |

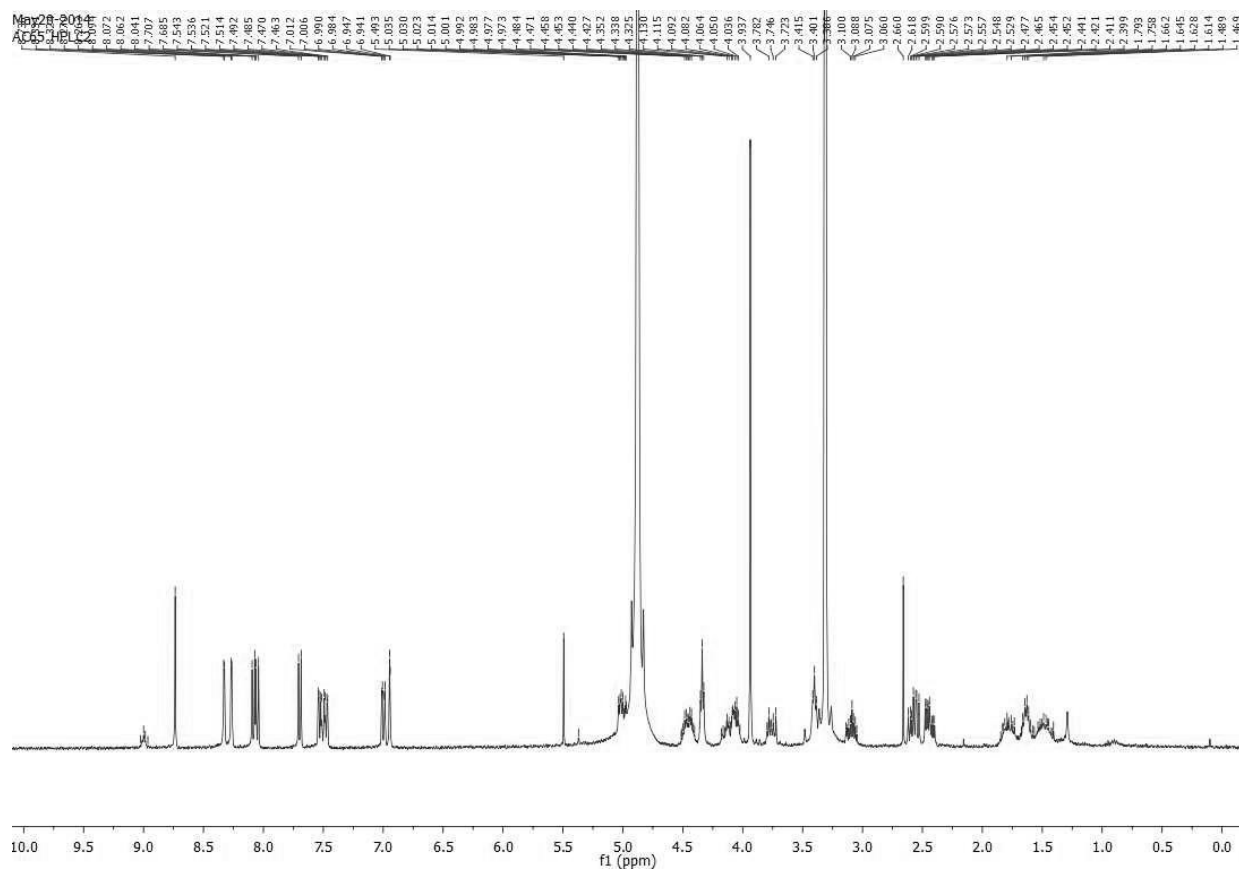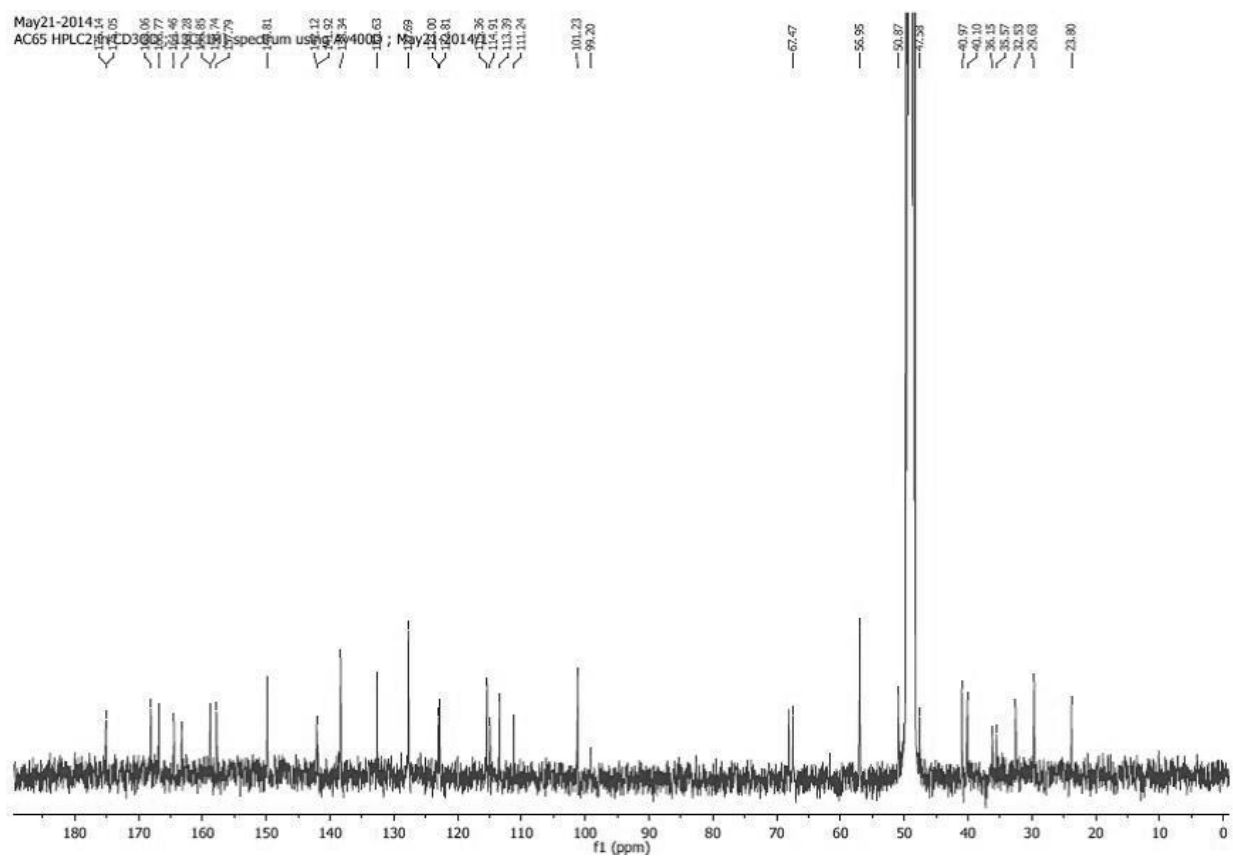

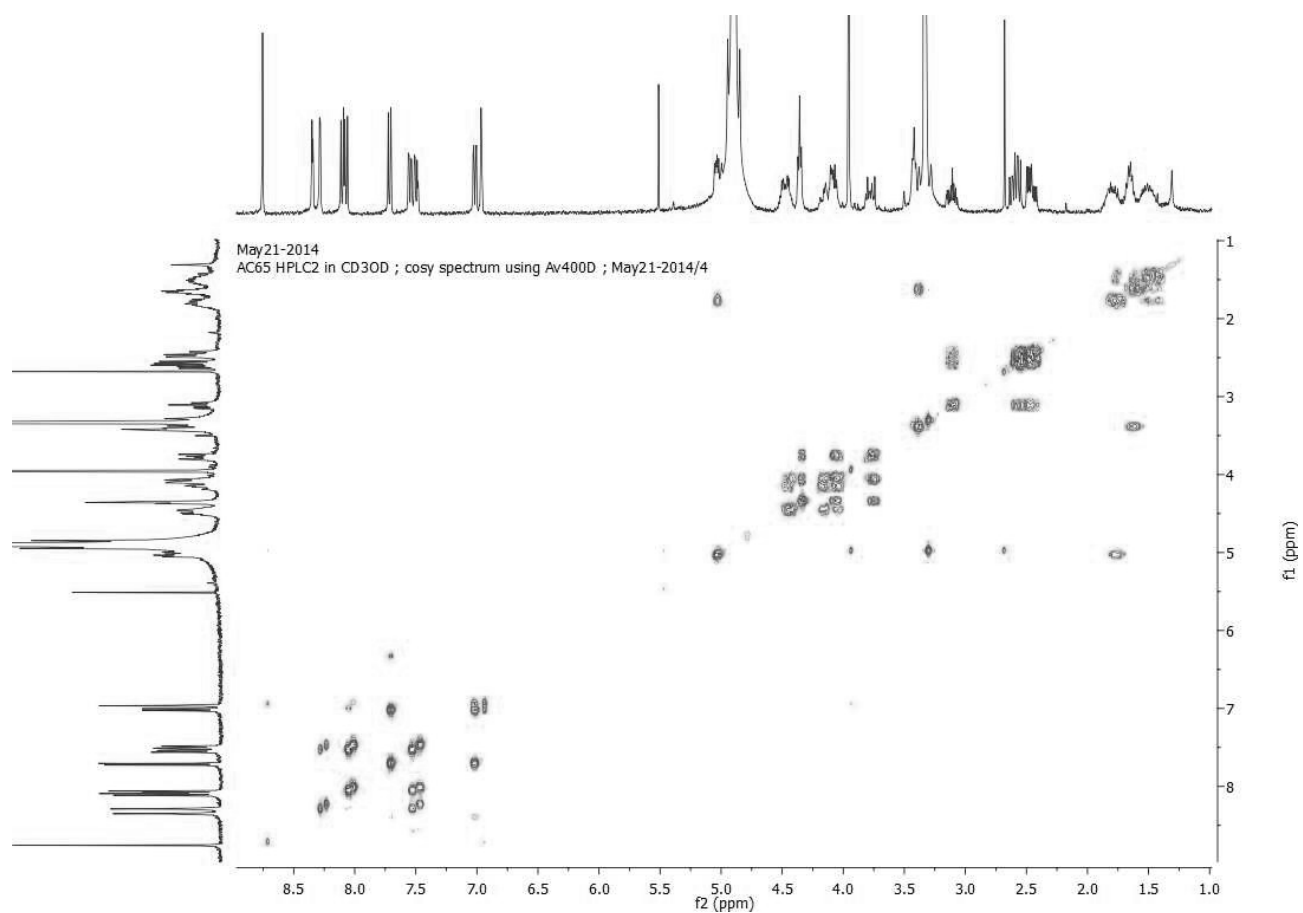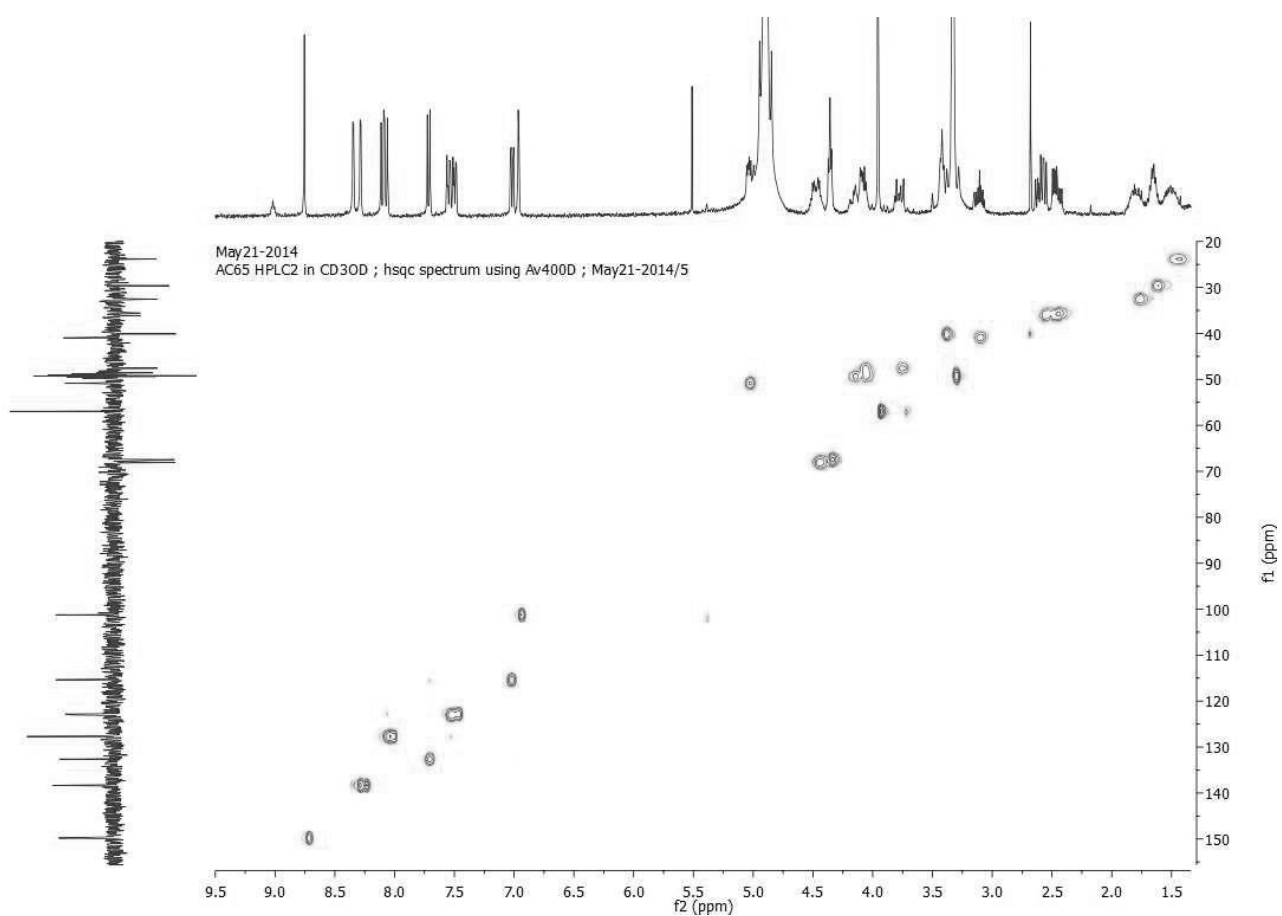

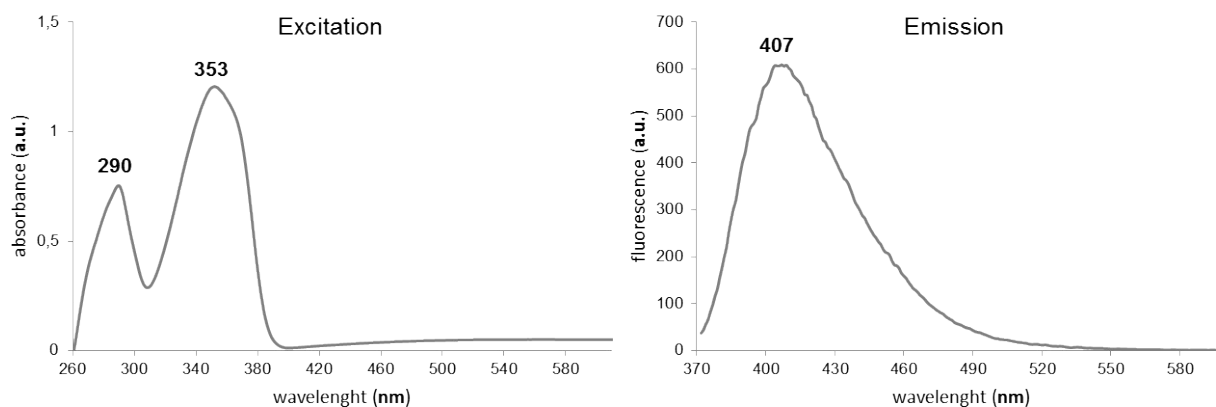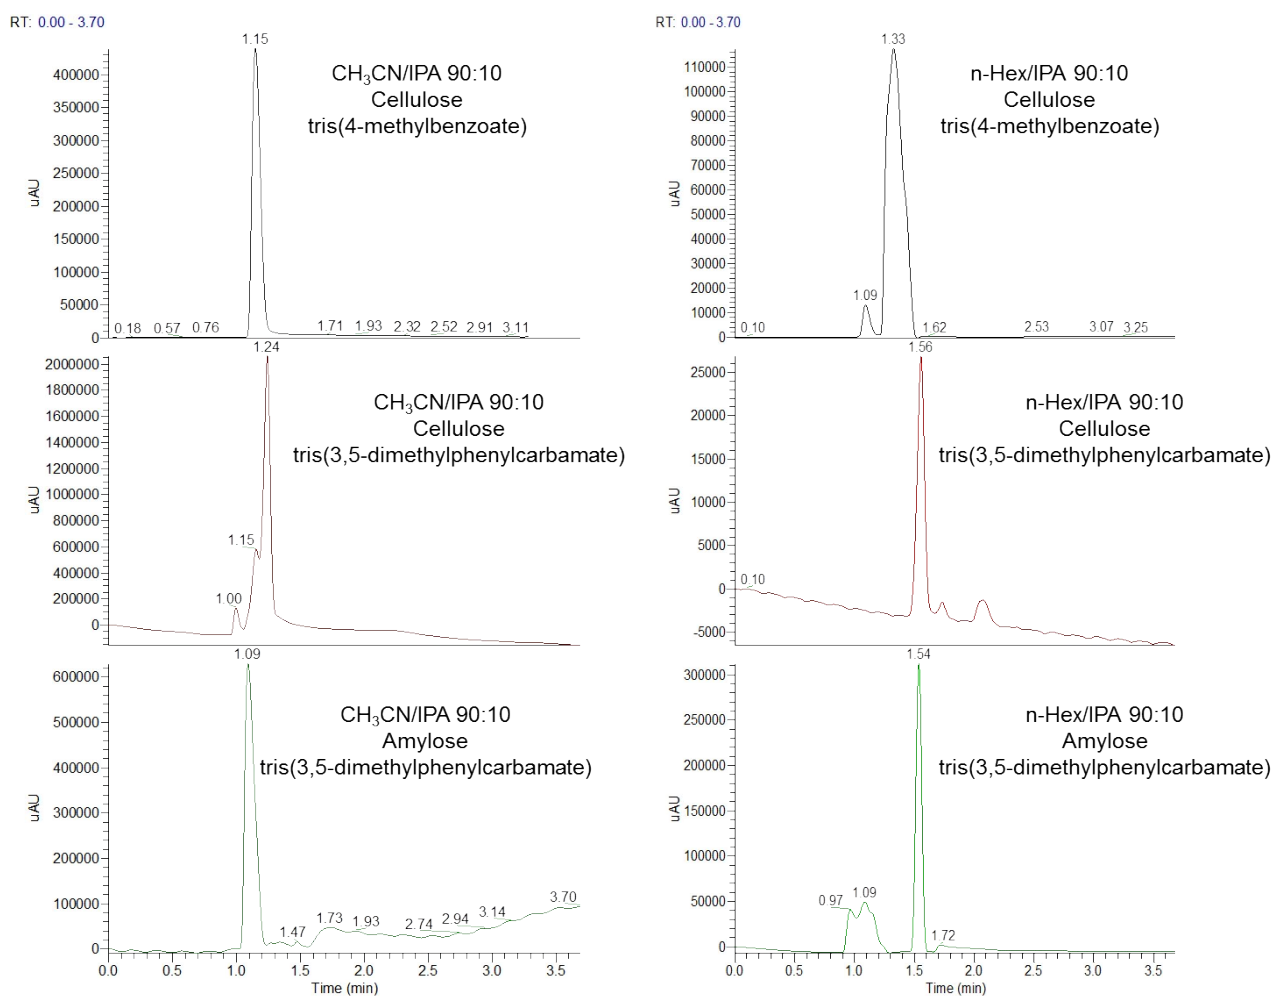

**Figure S1.** Analytical chiral HPLC profiles of ligand **15**. Stationary phases (columns): amylose tris(3,5-dimethylphenylcarbamate) (Lux Amylose-1), cellulose tris(3,5-dimethylphenylcarbamate) (Lux Cellulose-1), and cellulose tris(4-methylbenzoate) (Lux Cellulose-3); eluents: n-Hex/IPA and CH<sub>3</sub>CN/IPA 90:10; flow rate: 1.0 mL/min; temperature: 25°C; UV detection: 254 nm.

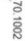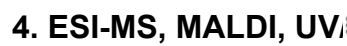

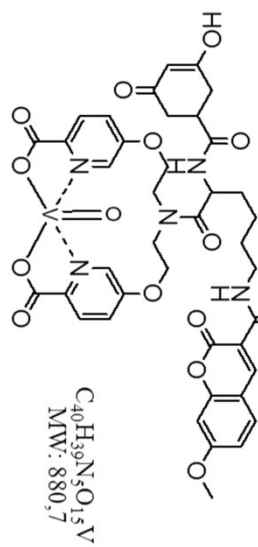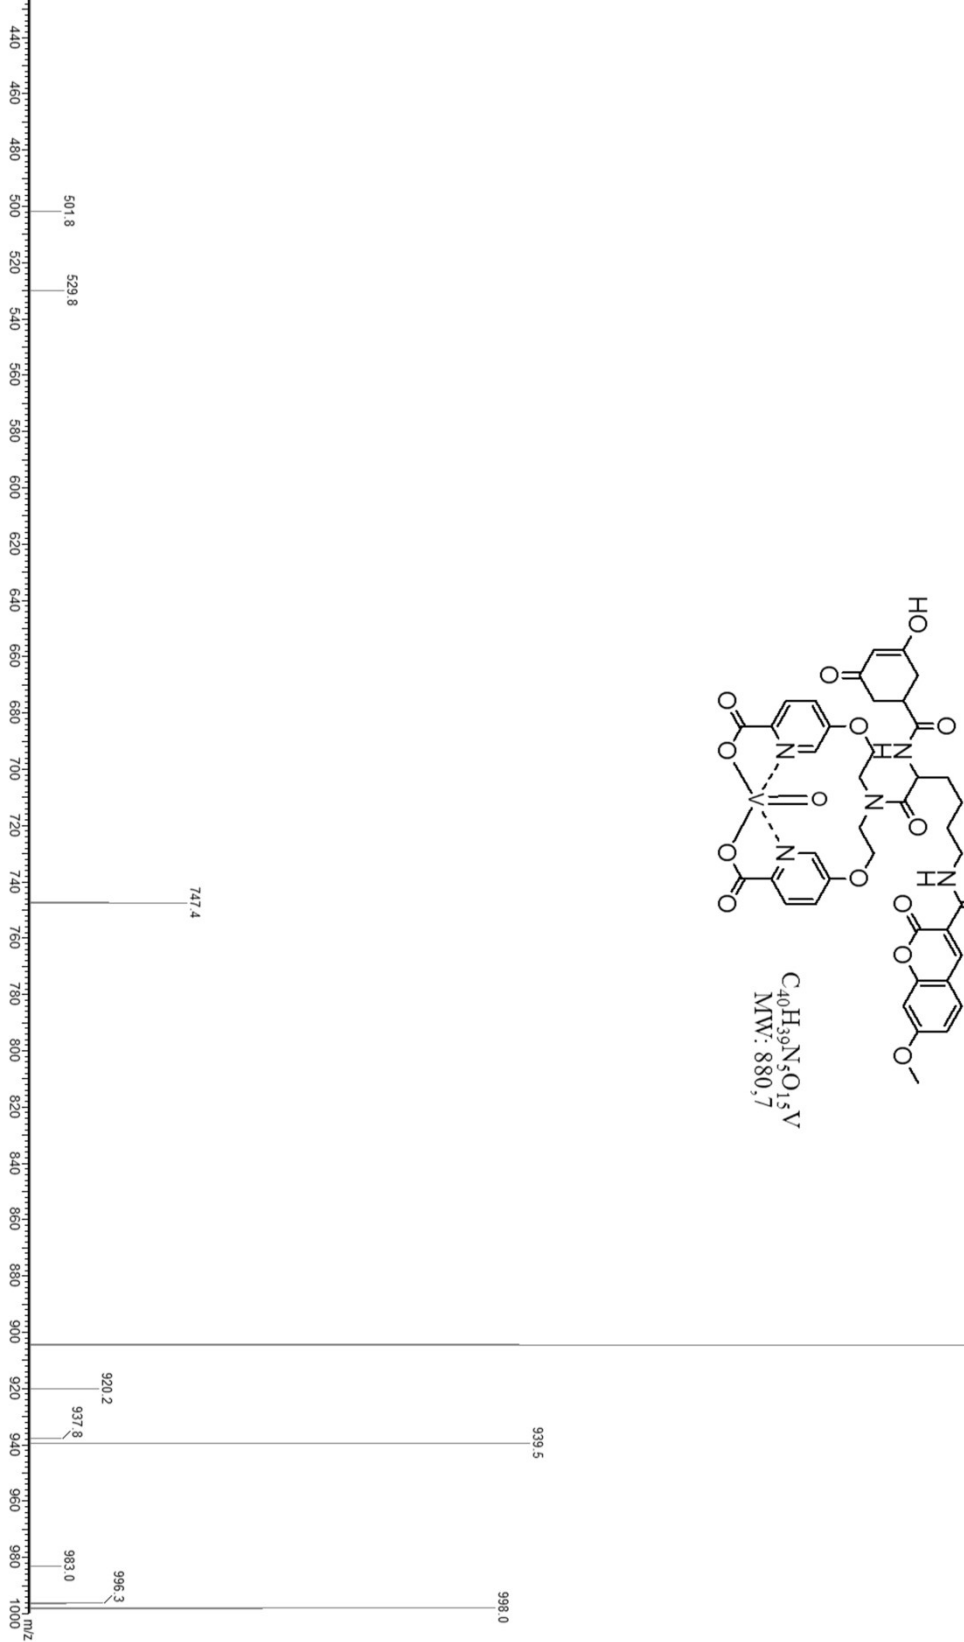

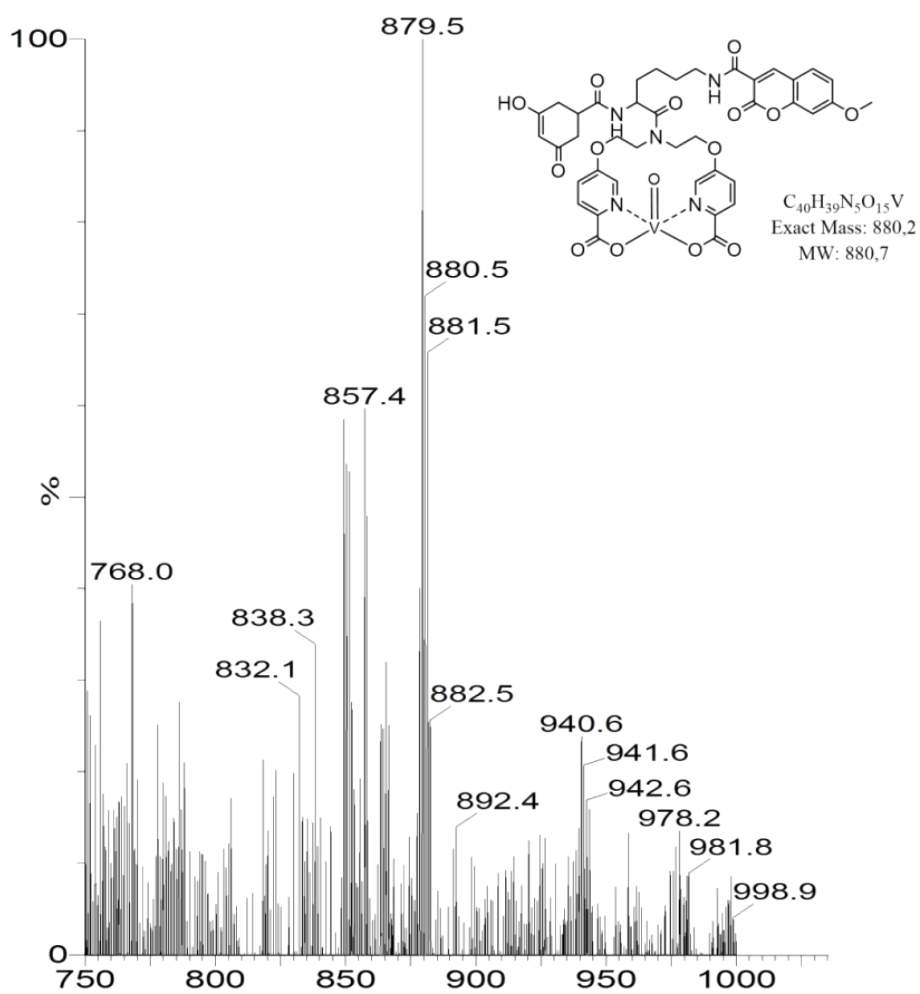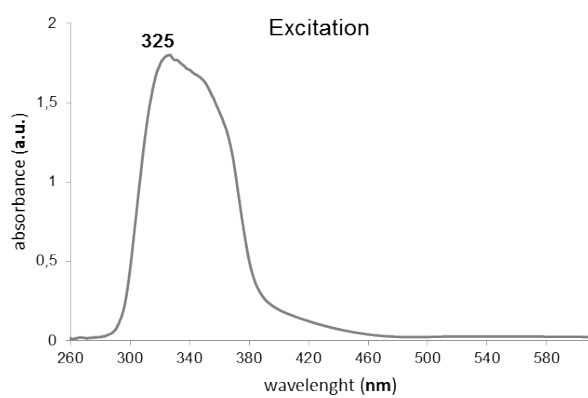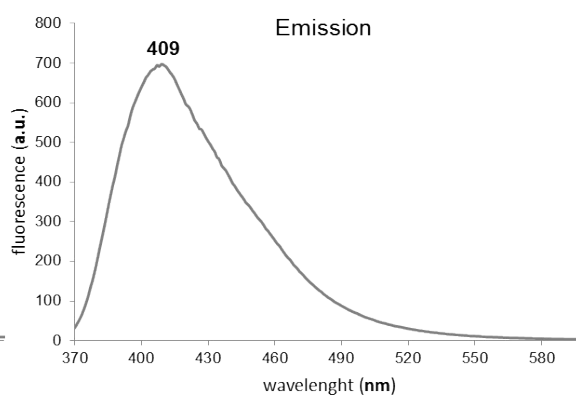

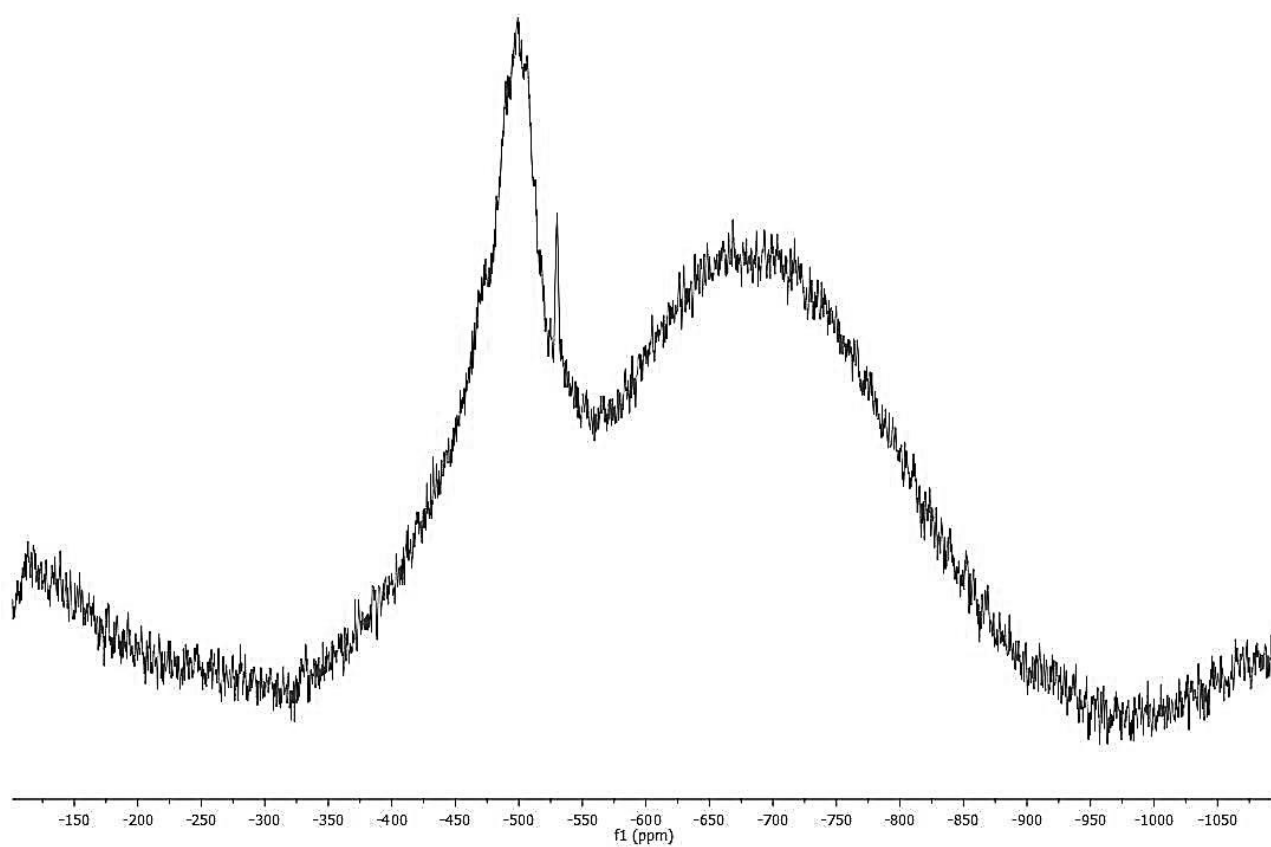

**Figure S2.**  $^{51}\text{V}$  NMR spectrum of **16** (3 mg) recorded after 72 h in solution (DMSO- $d_6$ , *ca.* 400  $\mu\text{L}$ ).



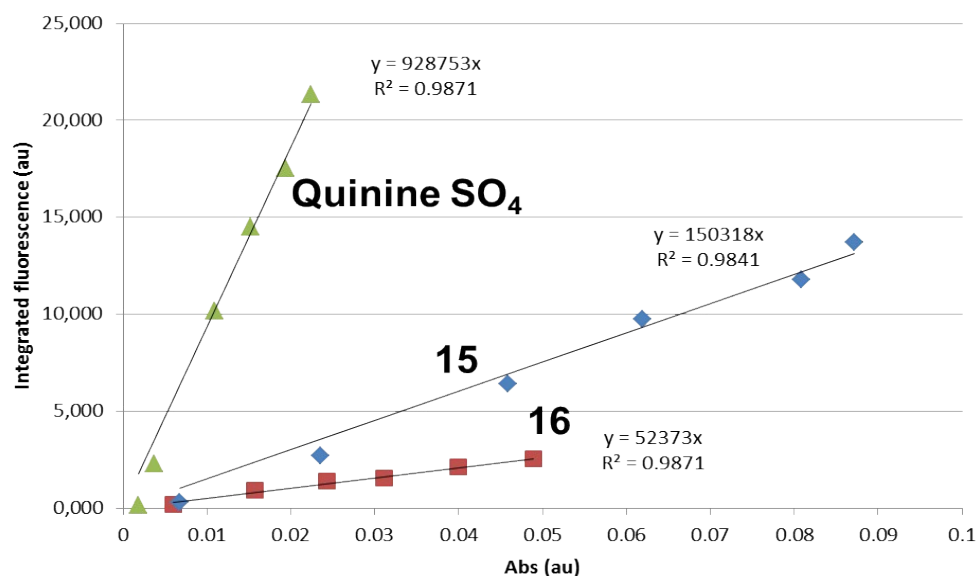

**Figure S3.** Linear plots for the calculation of fluorescence quantum yields for **15** and **16**. The gradient of each plot (IF vs A) is proportional to the quantum yield of the sample. For each test sample, the  $\Phi_F$  value is obtained relevant to the standard (quinine sulphate) and represents the quantum yield value calculated.

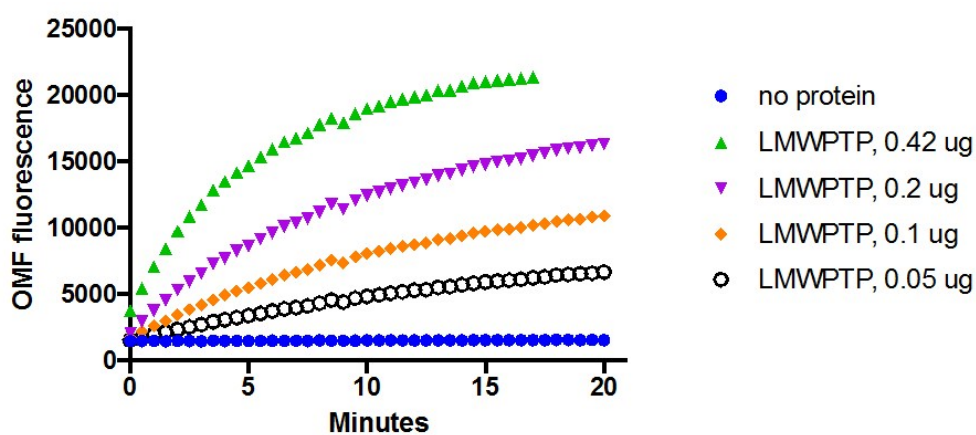

|              | no protein      | LMW-PTP, 0.05 $\mu\text{g}$ | LMW-PTP, 0.1 $\mu\text{g}$ | LMW-PTP, 0.21 $\mu\text{g}$ | LMW-PTP, 0.42 $\mu\text{g}$ |
|--------------|-----------------|-----------------------------|----------------------------|-----------------------------|-----------------------------|
| Slope Values | $4.45 \pm 0.20$ | $2841 \pm 110.5$            | $1424 \pm 41.41$           | $669.8 \pm 14.95$           | $287.8 \pm 5.95$            |

**Figure S4.** LMW-PTP activity (as an e.g. for all phosphatases) in the presence of OMFP as a substrate. Four slope lines represent measurements of OMFP hydrolysis in the presence of LMW-PTP-GST (0.05 – 0.42  $\mu\text{g}$ ). Horizontal line corresponds to the background measurements in the absence of LMW-PTP. High values of the slopes indicate high LMW-PTP phosphatase activity.

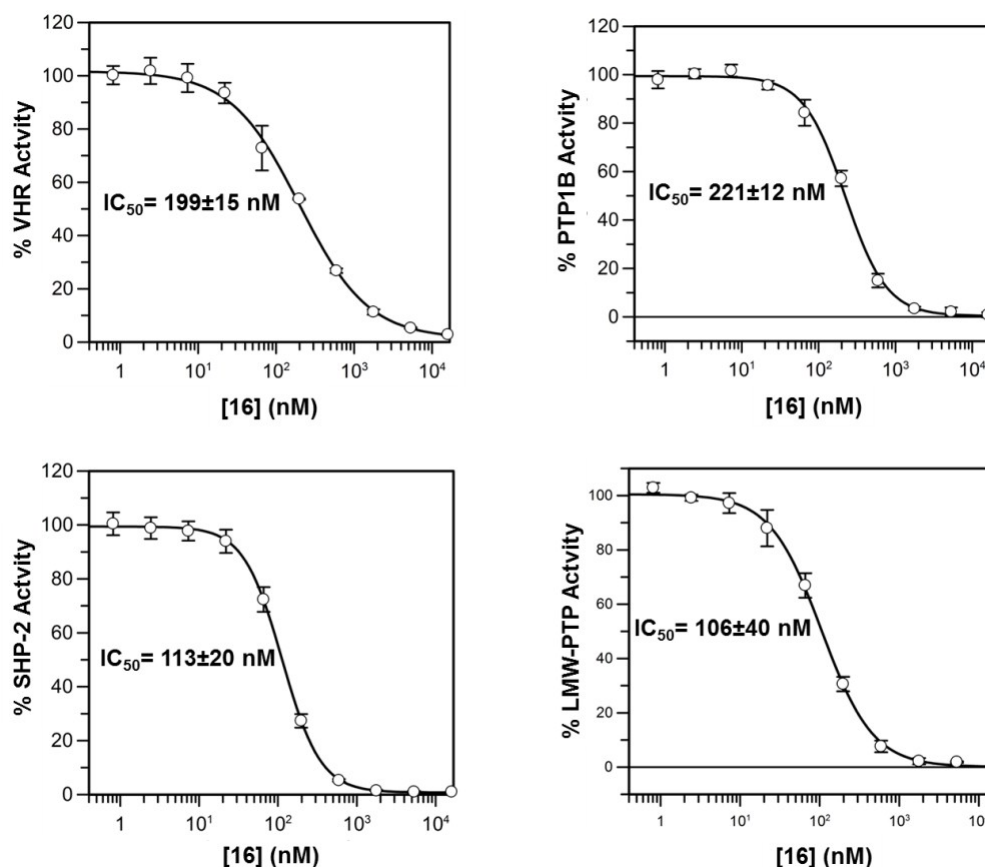

**Figure S5.**  $IC_{50}$  curves (values nM  $\pm$  standard deviation of triplicate repeats) of dimedone-based VO(pic)<sub>2</sub> complex **16** for PTP1B (= protein-tyrosine phosphatase 1B), SHP-2 (= Src homology region 2 domain-containing phosphatase-2), LMW-PTP (= low molecular weight protein tyrosine phosphatase), and VHR (= dual specificity protein phosphatase 3).

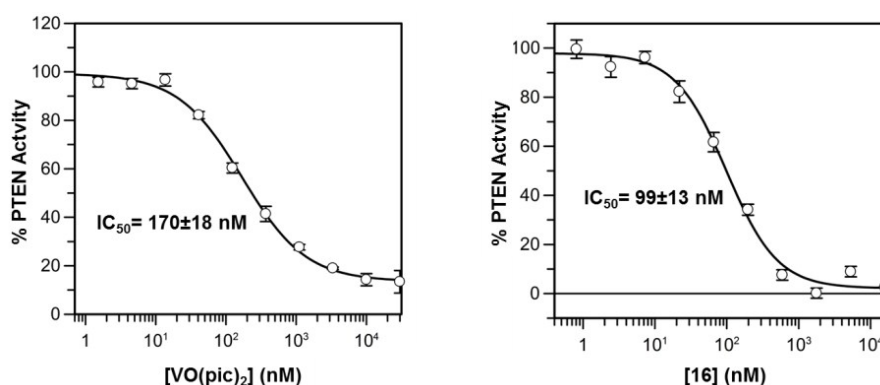

**Figure S6.**  $IC_{50}$  curves (values nM  $\pm$  standard deviation of triplicate repeats) of VO(pic)<sub>2</sub> (reference compound, Figure 1 - main text) and new dimedone-based VO(pic)<sub>2</sub> complex **16** for PTEN (= phosphatase and tensin homolog).

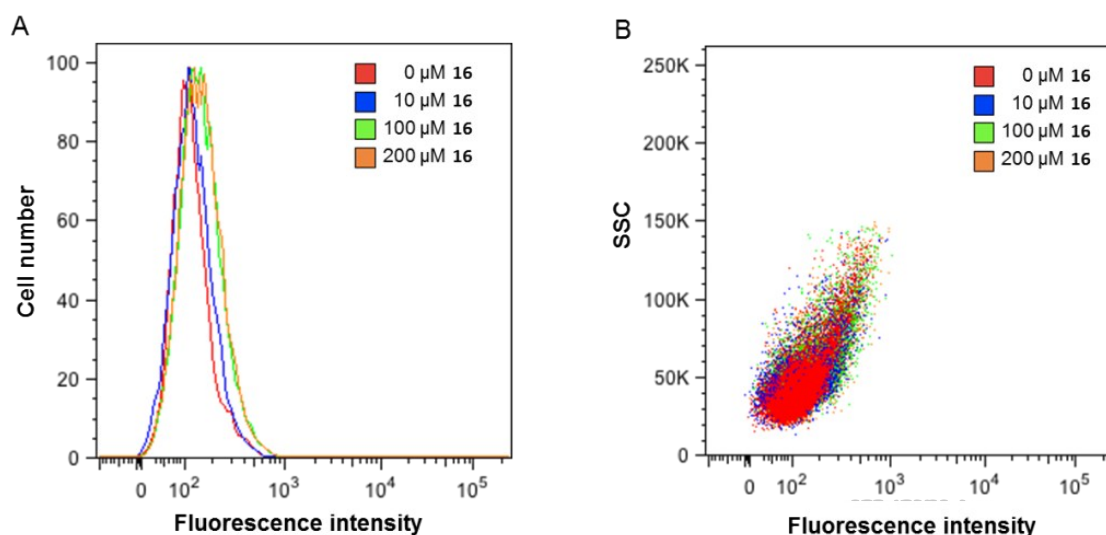

**Figure S7.** Live cell uptake of **16** (flow cytometry). Live HCT116 were treated with 10-200  $\mu\text{M}$  of **16** for 24 hours. Flow cytometry histogram (A) and dotplot (B) show no significant increase of fluorescence in HCT116 cells after 24 hours treatment with **16**, indicating that there is no detectable uptake of **16** in live HCT116 cells. Untreated cells are shown in Red. 10000 cells were measured for each analysis. Autofluorescence was measured in the absence of **16** (0  $\mu\text{M}$ ).

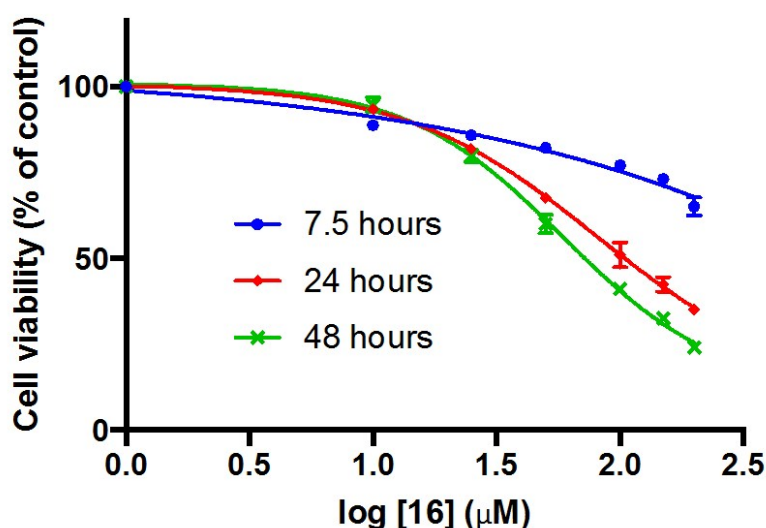

**Figure S8.** Cytotoxicity of **16**. HCT116 cells were treated with 100 nM PMA and 0 - 200  $\mu\text{M}$  of **16** for 7.5, 24 or 48 hours. Cell viability was measured by MTS assay. Data shown in average of triplicates  $\pm$  SD%.

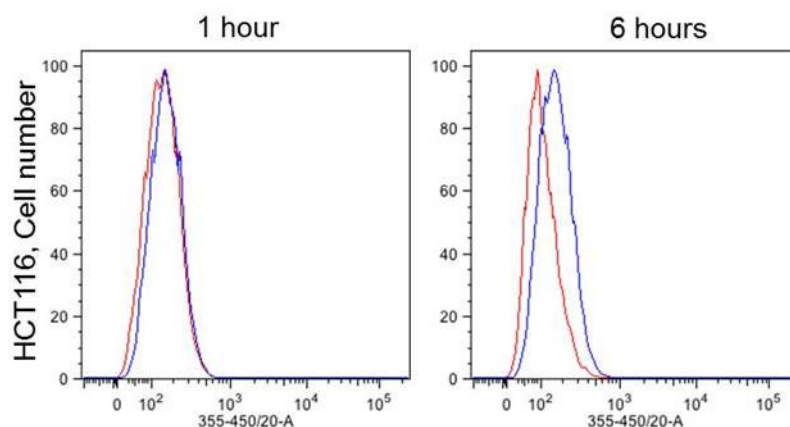

**Figure S9.** Live cell uptake of **16** + PMA (flow cytometry). Live HCT116 cells were co-treated with 100 nM PMA and 200 μM of **16** for 1 and 6 hours. Flow cytometry histograms show increase of fluorescence in HCT116 cells after 6 hours co-treatment (i.e. PMA + **16**), indicating that PMA treatment facilitates the uptake of **16** in HCT116 cells. Untreated cells are shown in Red. 10000 cells were measured for each analysis.

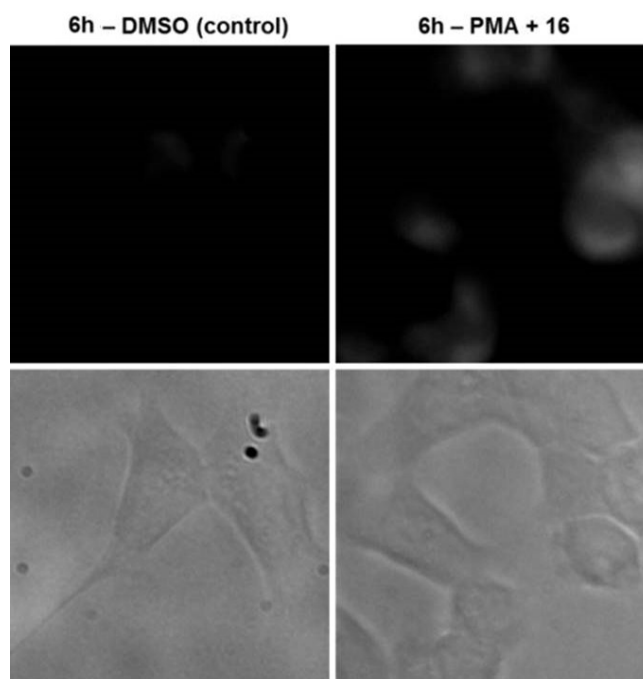

**Figure S10.** Live cell uptake of **16** + PMA (microscopy). Live HCT116 cells were co-treated with 100 nM PMA and 200 μM of **16** for 6, showing increase of fluorescence and indicating that PMA treatment facilitates the uptake of **16**. Untreated cells are shown at 6 hours (i.e. no incubation with PMA + **16**). Quantification of fluorescence signal was performed with FIJI.

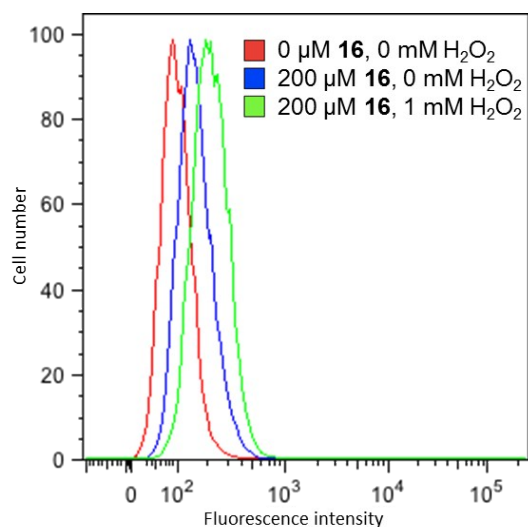

**Figure S11.** Flow cytometry histogram of HCT116 cells incubated with **16** under oxidative conditions. Live cells were co-treated with 100 nM PMA and **16** (200  $\mu$ M) for 6 hours following by addition of 0 or 1 mM of  $\text{H}_2\text{O}_2$  for 30 min. Cells treated with 1 mM  $\text{H}_2\text{O}_2$  (Green) show an increase in fluorescence intensity compared to the control (i.e. no  $\text{H}_2\text{O}_2$ , Blue). Untreated cells (no **16**, no  $\text{H}_2\text{O}_2$ ) are shown in Red. 10000 cells were measured for each analysis.

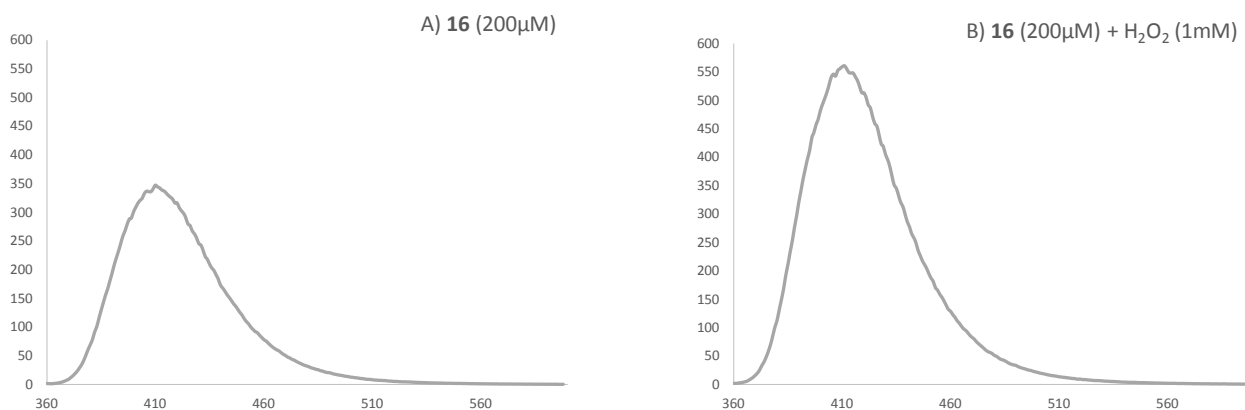

**Figure S12.** Emission spectra for **16** in the absence/presence of  $\text{H}_2\text{O}_2$  for 30 min. A) Fluorescence emission of **16** (200  $\mu$ M) in PBS. B) Fluorescence emission of **16** (200  $\mu$ M) + 30%  $\text{H}_2\text{O}_2$  (1mM) in PBS after 30 minutes.
